# Supplementary material for: Strontium phosphates with β-Ca3(PO4)2-type structures: Sr9NiLi(PO4)7, Sr9.04Ni1.02Na0.88(PO4)7, and Sr9.08Ni1.04K0.76(PO4)7
Source: Royal Society of Chemistry journal article supplement (doi:10.1039/b204808f), 2002-01-01
Supplement: b204808f_figs1.doc [file b204808f_figs1.doc]

Strontium phosphates with -Ca3(PO4)2-type structures: Sr9NiLi(PO4)7, Sr9.04Ni1.02Na0.88(PO4)7, and Sr9.08Ni1.04K0.76(PO4)7

Alexei A. Belik, Fujio Izumi, Takuji Ikeda, Artem P. Malakho and Bogdan I. Lazoryak

Journal of Materials Chemistry, Article No. B204808F

**Fig. S1**

IR spectra of (a) Sr9.333Ni1.167(PO4)7, (b) Sr9NiLi(PO4)7, (c) Sr9.04Ni1.02Na0.88(PO4)7, and (d) Sr9.08Ni1.04K0.76(PO4)7 in wavenumber () regions from 1350 cm1 to 750 cm1 and from 650 cm1 to 500 cm1.** : transmittance (arbitrary unit).
