# Supplementary material for: Strontium phosphates with β-Ca3(PO4)2-type structures: Sr9NiLi(PO4)7, Sr9.04Ni1.02Na0.88(PO4)7, and Sr9.08Ni1.04K0.76(PO4)7
Source: Royal Society of Chemistry journal article supplement (doi:10.1039/b204808f), 2002-01-01
Supplement: b204808f_tabs2.doc [file b204808f_tabs2.doc]

Strontium phosphates with -Ca3(PO4)2-type structures: Sr9NiLi(PO4)7, Sr9.04Ni1.02Na0.88(PO4)7, and Sr9.08Ni1.04K0.76(PO4)7

Alexei A. Belik, Fujio Izumi, Takuji Ikeda, Artem P. Malakho and Bogdan I. Lazoryak

Journal of Materials Chemistry, Article No. B204808F

# Table S2

Conditions of the XRD experiments and parts of refinement results forSr9.04Ni1.02Na0.88(PO4)7 (Na-SNP) and Sr9.08Ni1.04K0.76(PO4)7 (K-SNP)

|  | Na-SNP | K-SNP |
| --- | --- | --- |
| Space group | *R*3*c* (No. 161) | *R*3*c* (No. 161) |
| *Z* | 6 | 6 |
| 2** range /  | 10140 | 10140 |
| Step width /  | 0.02 | 0.02 |
| *I*max / counts | 99949 | 92134 |
| Lattice parameters:  *a* / Å  *c* / Å  *V* / Å3 | 10.6755(1)  38.9339(3)  3842.69(5) | 10.7128(1)  38.9492(3)  3871.11(6) |
| Number of Bragg reflections | 821 | 826 |
| Variables:  Structure/lattice  Profile/background  Scale/peak shifts  PPP a | 63/2  10/12  1/2  40 | 63/2  10/12  1/2  40 |
| *R*wp, *R*p  *R*B, *RF*  *S* b | 4.94 %, 3.59 %  1.53 %, 0.70 %  2.01 | 4.86 %, 3.53 %  1.50 %, 0.70 %  1.97 |

a Refined primary profile parameters.17

b *S* = *R*wp / *R*e.
